# Supplementary material
Source: MDPI journal article supplement (https://www.mdpi.com/2504-477X/7/4/155)
Supplement: s1 [file s1]

# Supplementary Information

Article

## Impact of Structure-Directing Agents in Synthesis of $\text{Cu}_2\text{Mo}_3\text{O}_9$ for Flexible Supercapacitor Electrodes

Siddhi Mehta <sup>1</sup>, Sangeetha Kumaravel <sup>2</sup>, Swarn Jha <sup>4</sup>, Matthew Yen <sup>5</sup>, Subrata Kundu <sup>2,3</sup>  
and Hong Liang <sup>1,4,\*</sup>

<sup>1</sup> Department of Materials Science and Engineering, Texas A&M University, 575 Ross Street, College Station, TX 77843-3127, USA

<sup>2</sup> Electrochemical Process Engineering (EPE) Division, CSIR-Central Electrochemical Research Institute (CECRI), Karaikudi 630003, India

<sup>3</sup> Academy of Scientific and Innovative Research (AcSIR), Ghaziabad 201002, India

<sup>4</sup> J. Mike Walker '66 Department of Mechanical Engineering, Texas A&M University, 202 Spence Street, College Station, TX 77843-3123, USA

<sup>5</sup> Artie McFerrin Department of Chemical Engineering, Texas A&M University, College Station, TX 77843-3123, USA

\* Correspondence: hliang@tamu.edu; Tel.: +1-(979)-862-2623; Fax: +1-979-845-3081

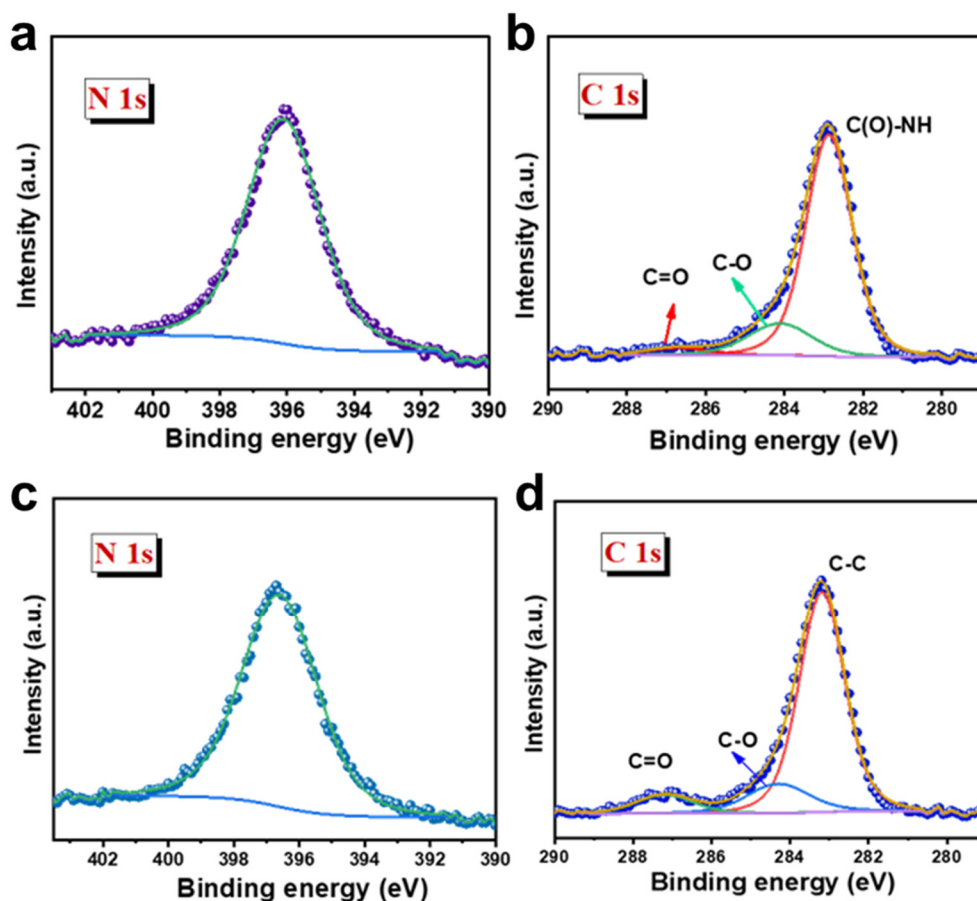

**Figure S1.** High magnified XPS spectra of individual elements N 1s and C 1s for the precursor: (a,b) DNA; (c,d) CTAB
